# Supplementary material for: The S-layer protein of a Clostridium difficile SLCT-11 strain displays a complex glycan required for normal cell growth and morphology
Source: PubMed Central journal article supplement (PMC6254364; doi:10.1074/jbc.ra118.004530), 2018-10-01
Supplement: supp_RA118.004530_138905_1_supp_211971_pfx22m.pdf [file supp_RA118.004530_138905_1_supp_211971_pfx22m.pdf]

# The S-layer protein of a *Clostridium difficile* SLCT-11 strain displays a complex glycan required for normal cell growth and morphology

Emma Richards<sup>a1</sup>, Laura Bouché<sup>a1</sup>, Maria Panico<sup>1</sup>, Ana Arbeloa<sup>1</sup>, Evgeny Vinogradov<sup>2</sup>, Howard Morris<sup>1,3</sup>, Brendan Wren<sup>4</sup>, Susan M. Logan<sup>2</sup>, Anne Dell<sup>1\*</sup> and Neil F. Fairweather<sup>1\*</sup>

## Supporting Information

|           |                                                                                                                                                   |
|-----------|---------------------------------------------------------------------------------------------------------------------------------------------------|
| Table S1  | Predicted functions of genes present in the S-layer glycosylation cluster                                                                         |
| Table S2A | Bacterial strains used in this study                                                                                                              |
| Table S2B | Plasmids used in this study                                                                                                                       |
| Table S2C | Oligonucleotides used in this study                                                                                                               |
| Figure S1 | MS data of Ox247 <i>orf3</i> mutant                                                                                                               |
| Figure S2 | The GC-EIMS total ion current chromatograms for the alditol acetate derivatives of hydrolysed sugars from Ox247 LMW SLP                           |
| Figure S3 | Southern blot analysis of Ox247 mutants                                                                                                           |
| Figure S4 | Complementation of cell length defects                                                                                                            |
| Figure S5 | Summed MS data acquired at 40.2 min in the <i>online</i> nanoLC-ES-MS of a tryptic digest of the band at 20 kDa of Ox247 <i>orf4::erm</i> mutant. |

**Table S1. Predicted functions of genes present in the S-layer glycosylation cluster**

| Gene         | Closest species match <sup>1</sup>     | Identity (%) | Accession Number | Conserved Domains Identified <sup>2</sup> | Putative Function                                                                | Homolog in <i>Geobacillus stearothermophilus</i> S-layer glycosylation system <sup>3</sup> |
|--------------|----------------------------------------|--------------|------------------|-------------------------------------------|----------------------------------------------------------------------------------|--------------------------------------------------------------------------------------------|
| <i>orf1</i>  | -                                      | -            | -                | none                                      | -                                                                                | -                                                                                          |
| <i>orf2</i>  | <i>Firmicutes bacterium</i><br>CAG:424 | 57           | CDC47796.1       | WcaJ_sugtrans                             | Undecaprenyl-phosphate<br>glucose phosphotransferase                             | WsaP                                                                                       |
| <i>orf3</i>  | <i>Methanobacterium</i>                | 58           | WP_048190924.1   | GT_2_like_c                               | Glycosyltransferase                                                              | -                                                                                          |
| <i>orf4</i>  | <i>Planctomycetes bacterium</i>        | 44           | OHB99936.1       | PKK12324<br>PT_UbiA_2                     | Phosphoribose diphosphate--<br>decaprenyl-phosphate<br>phosphoribosyltransferase | -                                                                                          |
| <i>orf5</i>  | <i>Paenibacillus macerans</i>          | 30           | OMG48725.1       | YfhO<br>Glucos_Trans_II                   | Glycosyltransferase                                                              | -                                                                                          |
| <i>orf6</i>  | <i>Methanoculleus sediminis</i>        | 56           | WP_082122685.1   | Glyco_tran_WbsX                           | Glycosyltransferase                                                              | -                                                                                          |
| <i>orf7</i>  | <i>Paenibacillus polymyxa</i>          | 43           | WP_023990592.1   | Glyco_tran_WbsX                           | Glycosyltransferase                                                              | -                                                                                          |
| <i>orf8</i>  | <i>Marichromatium gracile</i>          | 50           | WP_062274959     | GT8_Glycogenin<br>Glyco_Transf_8          | Glycosyltransferase                                                              | -                                                                                          |
| <i>orf9</i>  | <i>Clostridium beijerinckii</i>        | 37           | WP_077854956.1   | Glyco_tranf_GTA_type                      | Glycosyltransferase                                                              | -                                                                                          |
| <i>orf10</i> | <i>Clostridium butyricum</i>           | 71           | WP_035762026     | AdoMet_MTase                              | SAM methyltransferase<br>Glycosyltransferase                                     | -                                                                                          |
| <i>orf11</i> | <i>Clostridium beijerinckii</i>        | 65           | WP_077868321     | ABC_Kps_Wzt<br>Wzt_C-like                 | ABC transporter; ATP binding<br>protein                                          | Wzt                                                                                        |
| <i>orf12</i> | <i>Romboutsia maritimum</i>            | 79           | WP_095406846.1   | TagG<br>ABC2_membrane                     | ABC superfamily transporter:<br>permease                                         | Wzm                                                                                        |
| <i>orf13</i> | <i>Romboutsia maritimum</i>            | 73           | ZP_08166203.1    | RfbB                                      | dTDP-glucose 4,6-dehydratase                                                     | RmlB                                                                                       |
| <i>orf14</i> | <i>Clostridium perfringens</i>         | 72           | ZP_02863393.1    | dTDP_sugar_isom                           | dTDP-4-dehydrorhamnose 3,5-<br>epimerase                                         | RmlC                                                                                       |
| <i>orf15</i> | <i>Paenibacillus sp.</i><br>NAIST15-1  | 49           | GAV12381.1       | none                                      | ABC transporter related protein                                                  |                                                                                            |
| <i>orf16</i> | <i>Multispecies Clostridiales</i>      | 98           | ZP_08166199.1    | rmlA<br>G1P_TT_shor                       | Glucose-1-phosphate<br>thymidyltransferase                                       | RmlA                                                                                       |

|              |                                      |    |                |                              |                                  |      |
|--------------|--------------------------------------|----|----------------|------------------------------|----------------------------------|------|
| <i>orf17</i> | <i>Candidatus Dorea massiliensis</i> | 75 | WP_053832674.1 | RfbD                         | dTDP-4-dehydrorhamnose reductase | RmlD |
| <i>orf18</i> | <i>Romboutsia maritimum</i>          | 65 | WP_095406851.1 | BcsA<br>Glyco_tranf_GTA_type | glycosyltransferase              | -    |
| <i>orf19</i> | <i>Romboutsia lituseburensis</i>     | 47 | YP_004586423.1 | sorted_by_XrtN               | O-antigen polymerase/ligase      | WsaB |

<sup>1</sup> ORFs were analysed using BLASTP. To aid interpretation, *Clostridium difficile* was removed from the search database

<sup>2</sup> Top 1 or 2 hits from a Conserved Domain Database search

<sup>3</sup> Novotny et al (2004) Microbiology 150, 953–965

**Table S2.** Bacterial strains, plasmids and oligonucleotides used in this study

**A. Strains**

| <b>Strain</b>                                  | <b>Characteristics and source</b>               |
|------------------------------------------------|-------------------------------------------------|
| <i>C. difficile</i> Ox247                      | Ribotype 005, SLCT-11; Kate Dingle (1)          |
| <i>C. difficile</i> Ox247<br><i>orf2::erm</i>  | Insertional mutant in <i>orf2</i> ; this study  |
| <i>C. difficile</i> Ox247<br><i>orf3::erm</i>  | Insertional mutant in <i>orf3</i> ; this study  |
| <i>C. difficile</i> Ox247<br><i>orf4::erm</i>  | Insertional mutant in <i>orf4</i> ; this study  |
| <i>C. difficile</i> Ox247<br><i>orf7::erm</i>  | Insertional mutant in <i>orf7</i> ; this study  |
| <i>C. difficile</i> Ox247<br><i>orf16::erm</i> | Insertional mutant in <i>orf16</i> ; this study |
| <i>C. difficile</i> Ox247<br><i>orf19::erm</i> | Insertional mutant in <i>orf19</i> ; this study |
| <i>C. difficile</i> 630                        | Ribotype 012, Peter Mullany (2)                 |
| <i>C. difficile</i> R20291                     | Ribotype 027; SLCT-4; Brendan Wren (3)          |

## B. Plasmids

| <b>Plasmid</b>    | <b>Description</b>                                                       |
|-------------------|--------------------------------------------------------------------------|
| pMTL007C-E5-orf2  | ClosTron plasmid retargeting <i>orf3</i> in Ox247 glycosylation cluster  |
| pMTL007C-E5-orf3  | ClosTron plasmid retargeting <i>orf3</i> in Ox247 glycosylation cluster  |
| pMTL007C-E5-orf4  | ClosTron plasmid retargeting <i>orf4</i> in Ox247 glycosylation cluster  |
| pMTL007C-E5-orf7  | ClosTron plasmid retargeting <i>orf7</i> in Ox247 glycosylation cluster  |
| pMTL007C-E5-orf16 | ClosTron plasmid retargeting <i>orf16</i> in Ox247 glycosylation cluster |
| pMTL007C-E5-orf19 | ClosTron plasmid retargeting <i>orf19</i> in Ox247 glycosylation cluster |
| pAAM008           | pRPF185 with <i>orf2</i> cloned into BamHI and SacI sites                |
| pAAM009           | pRPF185 with <i>orf19</i> cloned into BamHI and SacI sites               |
| pAAM010           | pRPF144 with <i>orf2</i> cloned into BamHI and SacI sites                |
| pAAM011           | pRPF144 with <i>orf19</i> cloned into BamHI and SacI sites               |
| pEJR003           | pRPF185 with <i>orf3</i> cloned to BamHI and SacI sites                  |
| pEJR004           | pRPF144 with <i>orf3</i> cloned to BamHI and SacI sites                  |
| pEJR006           | pRPF144 with <i>orf4</i> cloned into BamHI and SacI sites                |
| pEJR007           | pRPF185 with <i>orf4</i> cloned into BamHI and SacI sites                |
| pEJR008           | pRPF144 with <i>orf16</i> cloned into BamHI and SacI sites               |
| pEJR009           | pRPF185 with <i>orf16</i> cloned into BamHI and SacI sites               |

**Figure S1 A**

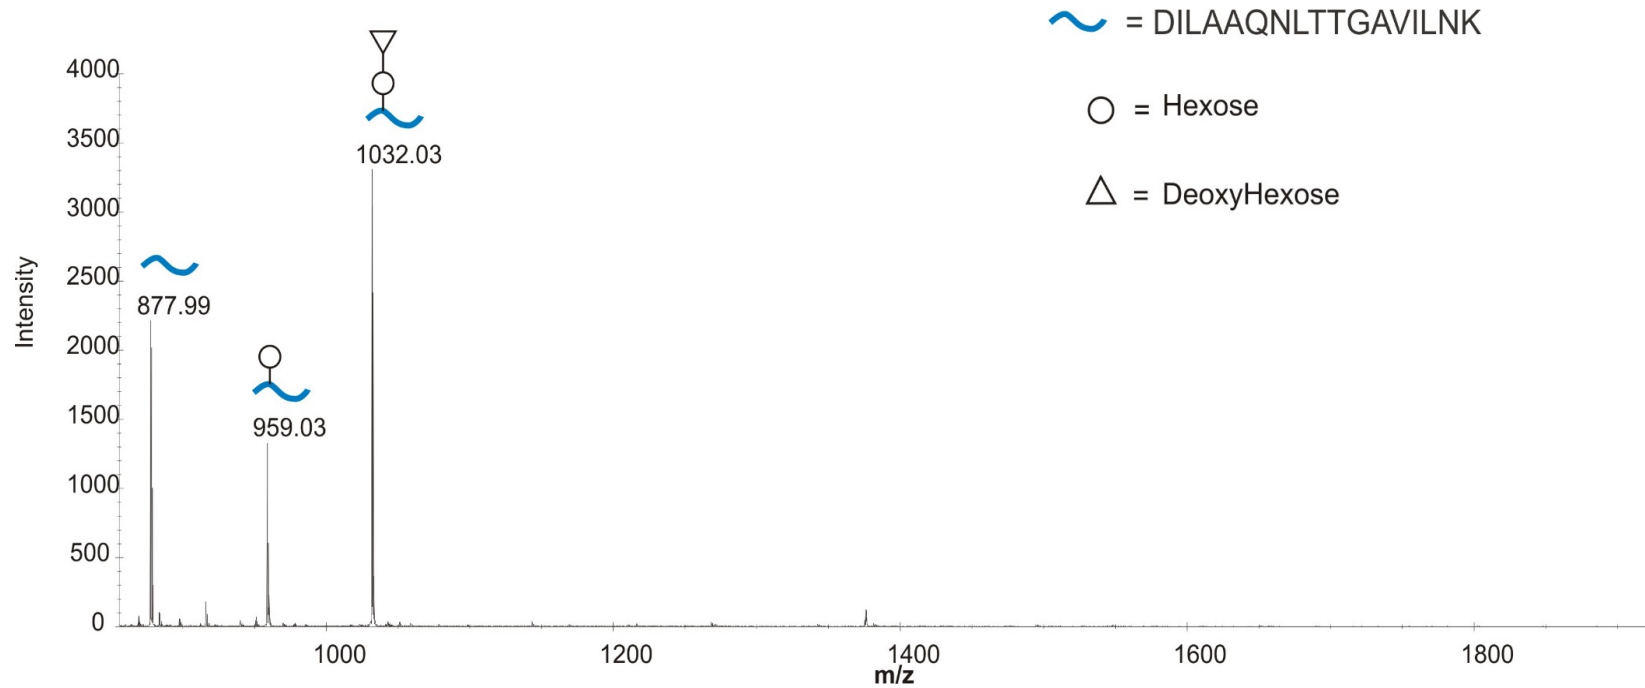

**Fig. S1 A.** Summed MS data acquired at 44.0 min in the *online* nanoLC-ES-MS of a tryptic digest of the 20 kDa band of the Ox247 *orf3::erm* mutant. Expanded middle mass region shows doubly-charged peaks that corresponds to glycans attached to the LMW SLP.

**Figure S1 B**

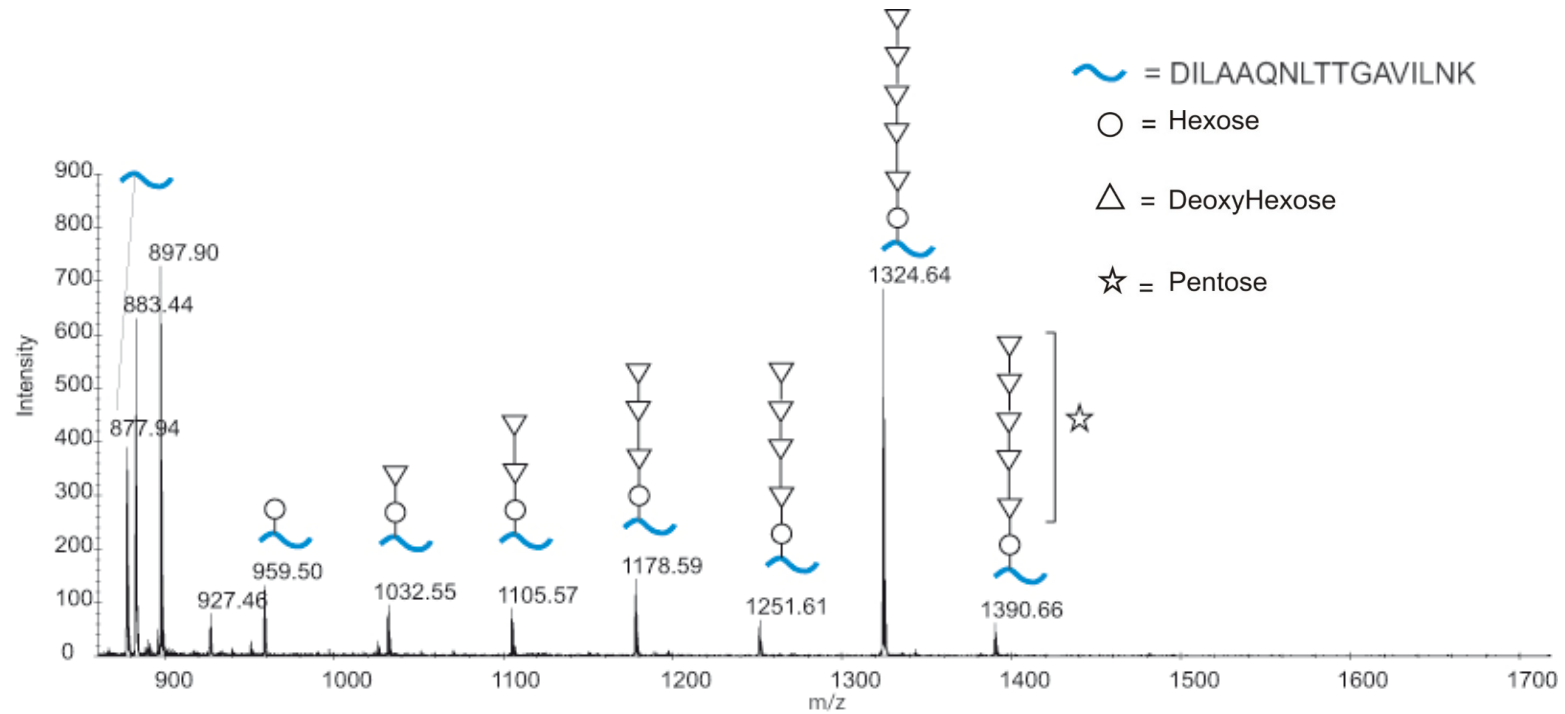

**Fig S1 B.** Summed MS data acquired at 40.6 min in the *online* nanoLC-ES-MS of a tryptic digest of the band at 25 kDa of the Ox247 *orf7::erm* mutant. Expanded middle mass region shows doubly-charged peaks that corresponds to glycan ranging from a single hexose up to PentdeoxyHex<sub>5</sub>Hex.

**Figure S2**

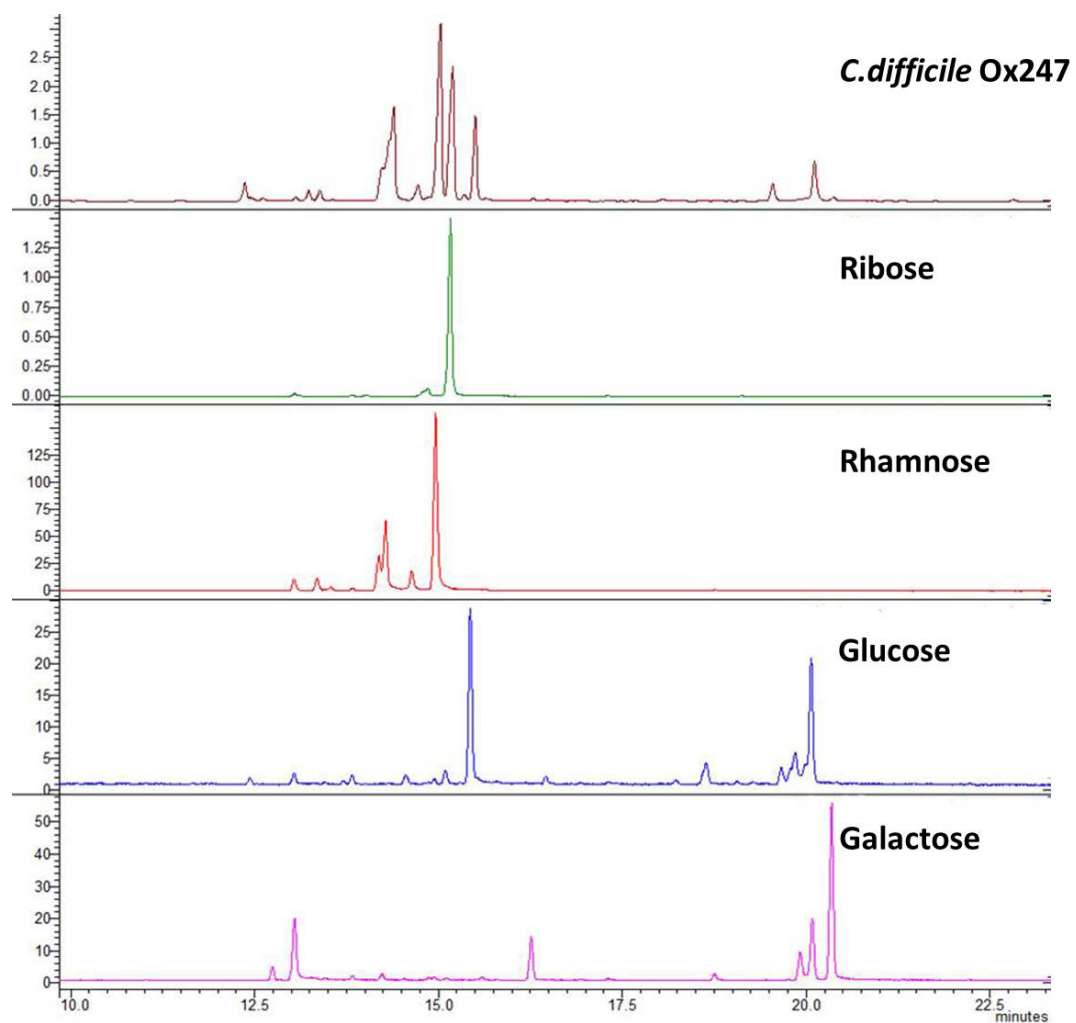

**Fig S2.** The GC-EIMS total ion current chromatograms for the alditol acetate derivatives of hydrolysed sugars from the LMW SLP WT Ox247 (top trace) compared to individual sugar standards taken through the same protocol (40). For interpretation, see the text.



Figure S3 Southern blot analysis of Ox247 mutants

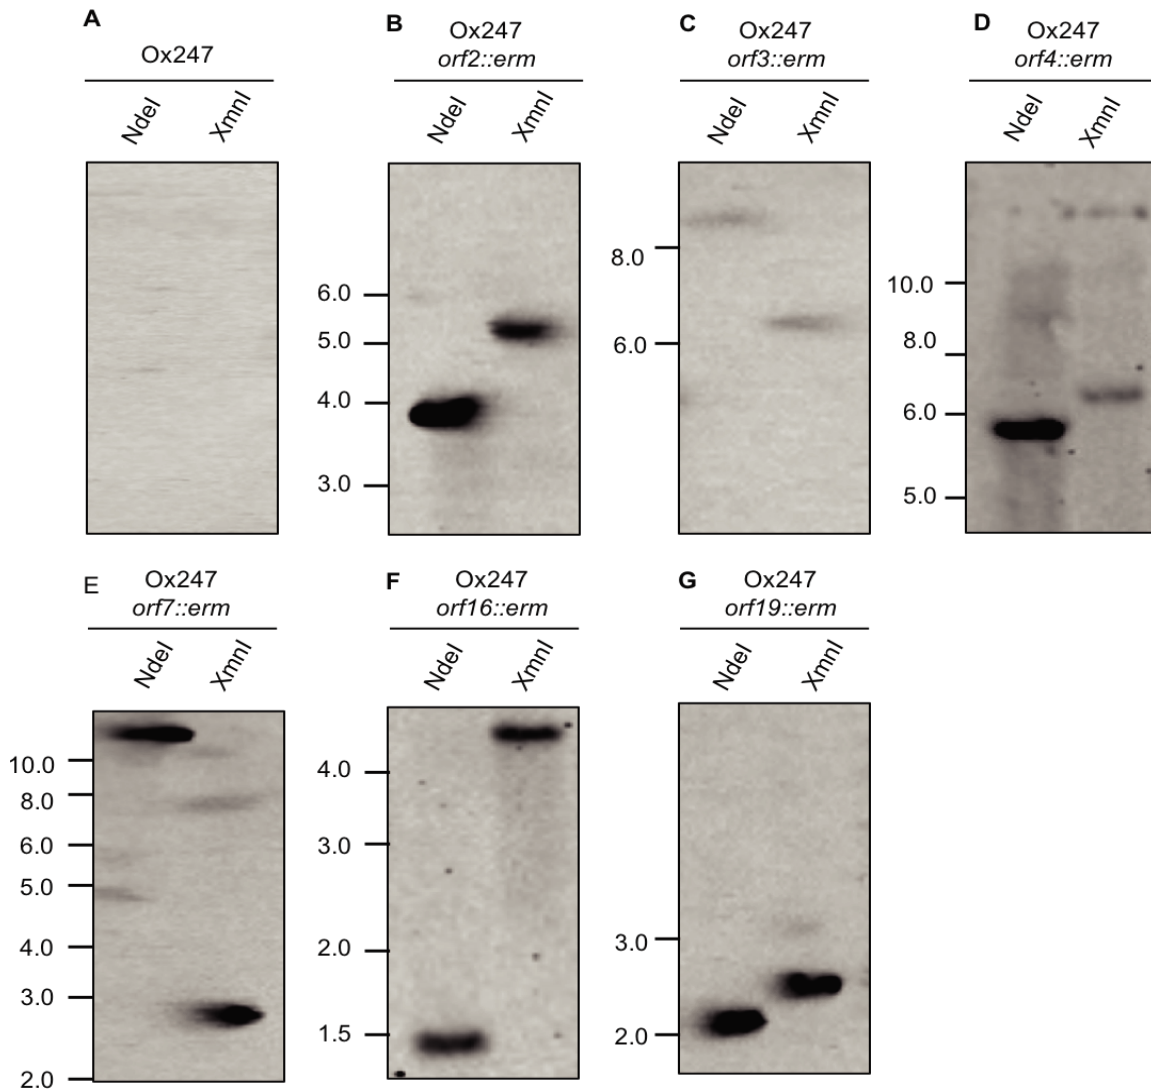

Southern blots were carried out using a probe that annealed to the 5' end of the group II intron. Genomic DNA was prepared and digested with NdeI and XmnI.

Expected sizes for A, Ox247, none (probe does not anneal to OX247 DNA);

B, Ox247 *orf2::erm*, ~3.9 kb, ~5.2 kb; C, Ox247 *orf3::erm*, ~6.4 kb, ~8.2kb;

D, Ox247 *orf4::erm*, ~5.9 kb, ~6.9 kb; E, Ox247 *orf7::erm*, ~2.8 kb, ~12.4 kb;

F, Ox247 *orf16::erm*, ~1.3 kb, ~4.5 kb and G, Ox247 *orf19::erm*, ~2.1 kb, ~2.4 kb.

# Figure S4

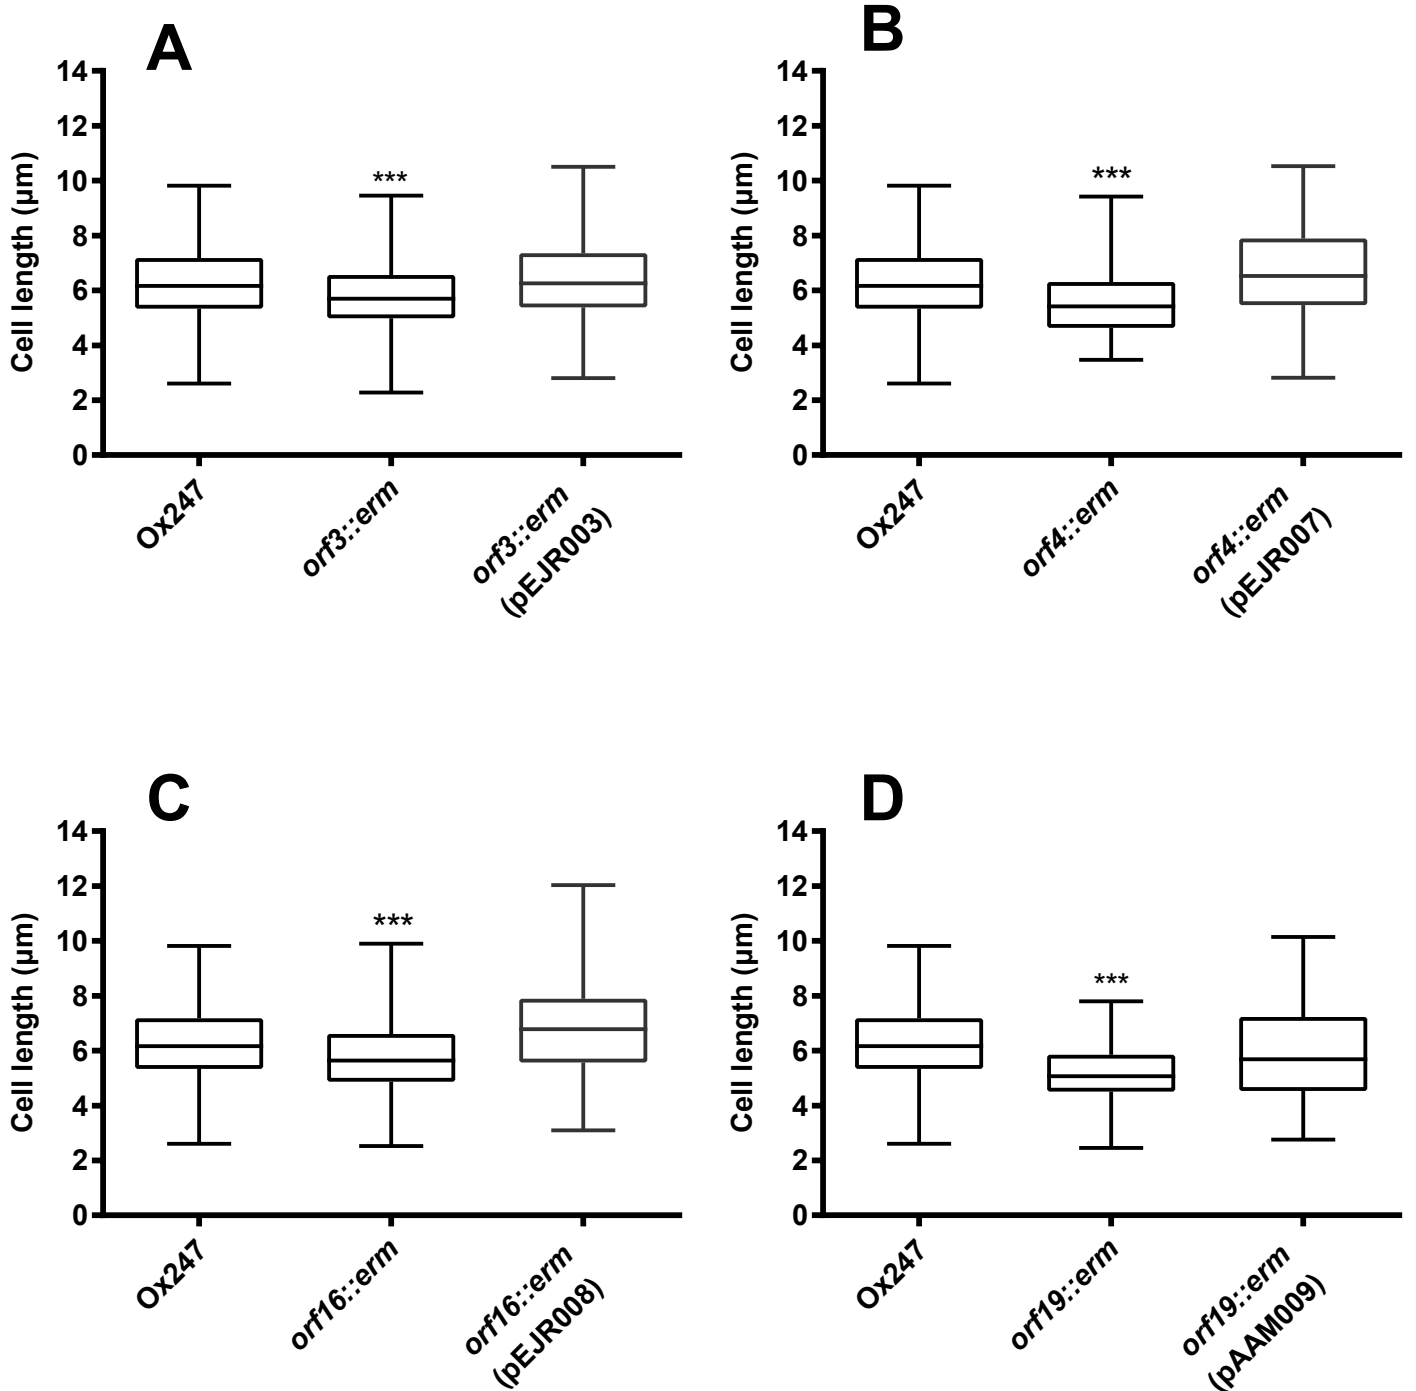

Fig S4. Complementation of cell length defect in (A), Ox247 *orf3*, (B) OX247 *orf4*, (C) Ox247 *orf16* and (D) Ox247 *orf19* mutants with the relevant plasmid expressing the wild type allele. The Ox247 data point in panel A is reused in panels B, C and D and is reused from Fig 10, because the data were acquired from the same experiment. The *orf3::erm*, *orf4::erm*, *orf16::erm* and *orf19::erm* data points are reused from Fig 10, panel A, because all the data was acquired from the same experiment.

Figure S5

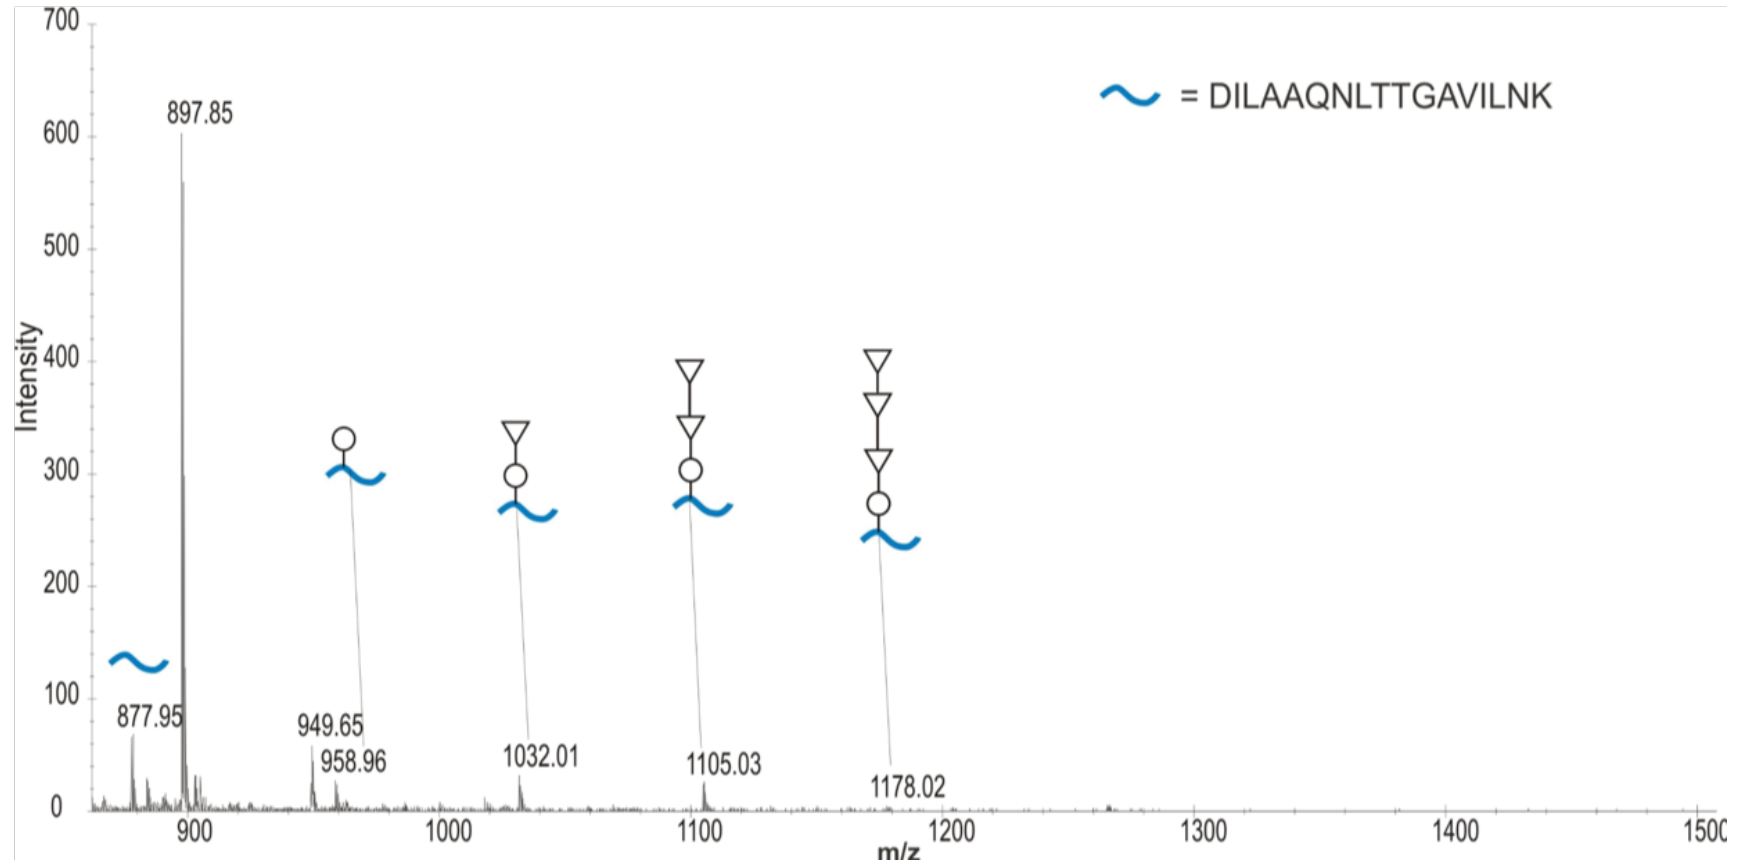

Fig S5. Summed MS data acquired at 40.2 min in the online nanoLC-ES-MS of a tryptic digest of the band at 20 kDa of Ox247 *orf4::erm* mutant. Expanded middle mass region to show doubly-charged peaks that corresponds to glycan compositions ranging from a single hexose up to dHex3Hex. m/z 897.95 is from elsewhere in the digest.

## References

1. Dingle, K. E., Didelot, X., Ansari, M. A., Eyre, D. W., Vaughan, A., Griffiths, D., Ip, C. L., Batty, E. M., Golubchik, T., Bowden, R., Jolley, K. A., Hood, D. W., Fawley, W. N., Walker, A. S., Peto, T. E., Wilcox, M. H., and Crook, D. W. (2013) Recombinational switching of the *Clostridium difficile* S-layer and a novel glycosylation gene cluster revealed by large-scale whole-genome sequencing. *J Infect Dis.* **207**, 675–686
2. Novotny, R., Schaffer, C., Strauss, J., and Messner, P. (2004) S-layer glycan-specific loci on the chromosome of *Geobacillus stearothermophilus* NRS 2004/3a and dTDP-L-rhamnose biosynthesis potential of *G. stearothermophilus* strains. *Microbiology.* **150**, 953–965
3. Sebaihia, M., Wren, B. W., Mullany, P., Fairweather, N. F., Minton, N., Stabler, R., Thomson, N. R., Roberts, A. P., Cerdeno-Tarraga, A. M., Wang, H., Holden, M. T., Wright, A., Churcher, C., Quail, M. A., Baker, S., Bason, N., Brooks, K., Chillingworth, T., Cronin, A., Davis, P., Dowd, L., Fraser, A., Feltwell, T., Hance, Z., Holroyd, S., Jagels, K., Moule, S., Mungall, K., Price, C., Rabinowitsch, E., Sharp, S., Simmonds, M., Stevens, K., Unwin, L., Whithead, S., Dupuy, B., Dougan, G., Barrell, B., and Parkhill, J. (2006) The multidrug-resistant human pathogen *Clostridium difficile* has a highly mobile, mosaic genome. *Nat Genet.* **38**, 779–786
4. Stabler, R. A., He, M., Dawson, L., Martin, M., Valiente, E., Corton, C., Lawley, T. D., Sebaihia, M., Quail, M. A., Rose, G., Gerding, D. N., Gibert, M., Popoff, M. R., Parkhill, J., Dougan, G., and Wren, B. W. (2009) Comparative genome and phenotypic analysis of *Clostridium difficile* 027 strains provides insight into the evolution of a hypervirulent bacterium. *Genome Biol.* **10**, R102
